# Supplementary material for: Pathogenic Process-Associated Transcriptome Analysis of Stemphylium lycopersici from Tomato
Source: Int J Genomics. 2022 May 20;2022:4522132. doi: 10.1155/2022/4522132 (PMC9142275; doi:10.1155/2022/4522132)
Supplement: Supplementary Materials — Table S1: the upregulated genes involved in CWDEs. Table S2: the KEGG analysis of the upregulated genes enriched in metabolic pathways associated with the focal adhesion pathway in 36 hpi-vs-Con. Table S3: the upregulated genes involved in signal reception and regulation. Table S4: the upregulated genes associated with fungal proteases. [file 4522132.f1.zip]

Archive with 4 entries (4 files):
- 4522132.f1/Table S1.docx
- 4522132.f1/Table S2.docx
- 4522132.f1/Table S3.docx
- 4522132.f1/Table S4.docx
